# Supplementary material for: Laser-induced acoustic desorption coupled with electrospray ionization mass spectrometry for rapid qualitative and quantitative analysis of glucocorticoids illegally added in creams
Source: Royal Society of Chemistry journal article supplement (doi:10.1039/d0an00962h), 2020-01-01
Supplement: d0an00962h1.pdf [file d0an00962h1.pdf]

## Supporting Information

### Laser-induced acoustic desorption coupled to electrospray ionization mass spectrometry for rapid qualitative and quantitative analysis of glucocorticoids illegally added in creams

Rongkun Lin, Qiao Lu, Zheng Lin, Wei Hang\*, and Benli Huang

*Department of Chemistry and the MOE Key Lab of Spectrochemical Analysis & Instrumentation, College of Chemistry and Chemical Engineering, Xiamen University, Xiamen 361005, China.*

**Corresponding author:**

E-mail: [weihang@xmu.edu.cn](mailto:weihang@xmu.edu.cn)

#### Contents

##### Supplemental Figures

**Fig. S1** Main ingredient information of the three kinds of creams.

**Fig. S2** Collision-induced dissociation (CID) spectra for five precursor ions using LIAD/ESI/MS for analysis of cream DR in positive mode.

**Fig. S3** Negative-ion LIAD/ESI mass spectrum of cream DR spiked with 50  $\mu\text{g g}^{-1}$  dexamethasone 21-acetate and 1  $\text{mg g}^{-1}$  beclomethasone dipropionate performed on LIAD/ESI/MS.

**Fig. S4** Collision-induced dissociation (CID) spectra of nine product ions using LIAD/ESI/MS for analysis of cream DR in negative mode.

**Fig. S5** Positive-ion LIAD/ESI mass spectrum of triamcinolone.

**Fig. S6** Negative-ion LIAD/ESI mass spectrum of cream TAEN (triamcinolone acetonide 1  $\text{mg g}^{-1}$ , econazole nitrate 10  $\text{mg g}^{-1}$ ).

**Fig. S7** Negative-ion LIAD/ESI mass spectrum of cream HB (Hydrocortisone Butyrate 1  $\text{mg g}^{-1}$ ).

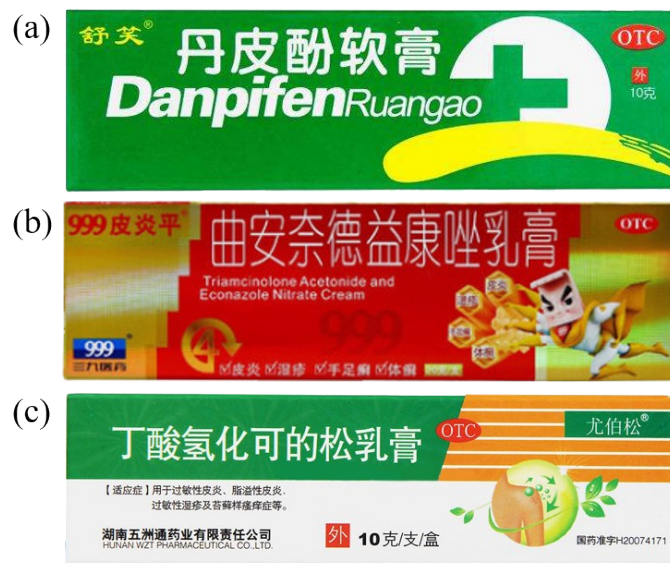

**Fig. S1** Main ingredient information of the three kinds of creams. (a) Cream DR. Principal ingredients: paeonol, oil of cloves; auxiliary materials: octadecanoic acid, glycerin monostearate, Glycerin, triethanolamine, potassium carbonate. (b) Cream TAEN. Principal ingredients: 10 mg g<sup>-1</sup> econazole nitrate, 1mg g<sup>-1</sup> Triamcinolone; auxiliary materials: albolene, glycerin, glycerin monostearate, glyceride distearate, hexadecanol, liquid paraffin, benzoic acid, polyacetylene (40) stearate, EDTA, butylated hydroxytoluene, water. (c) Cream HB. Principal ingredients: 1mg/g hydrocortisone; auxiliary materials: glycerin, propanediol, geoline, octadecanol, liquid paraffin, peregol A – 20, citric acid, sodium citrate, ethylparaben, water.

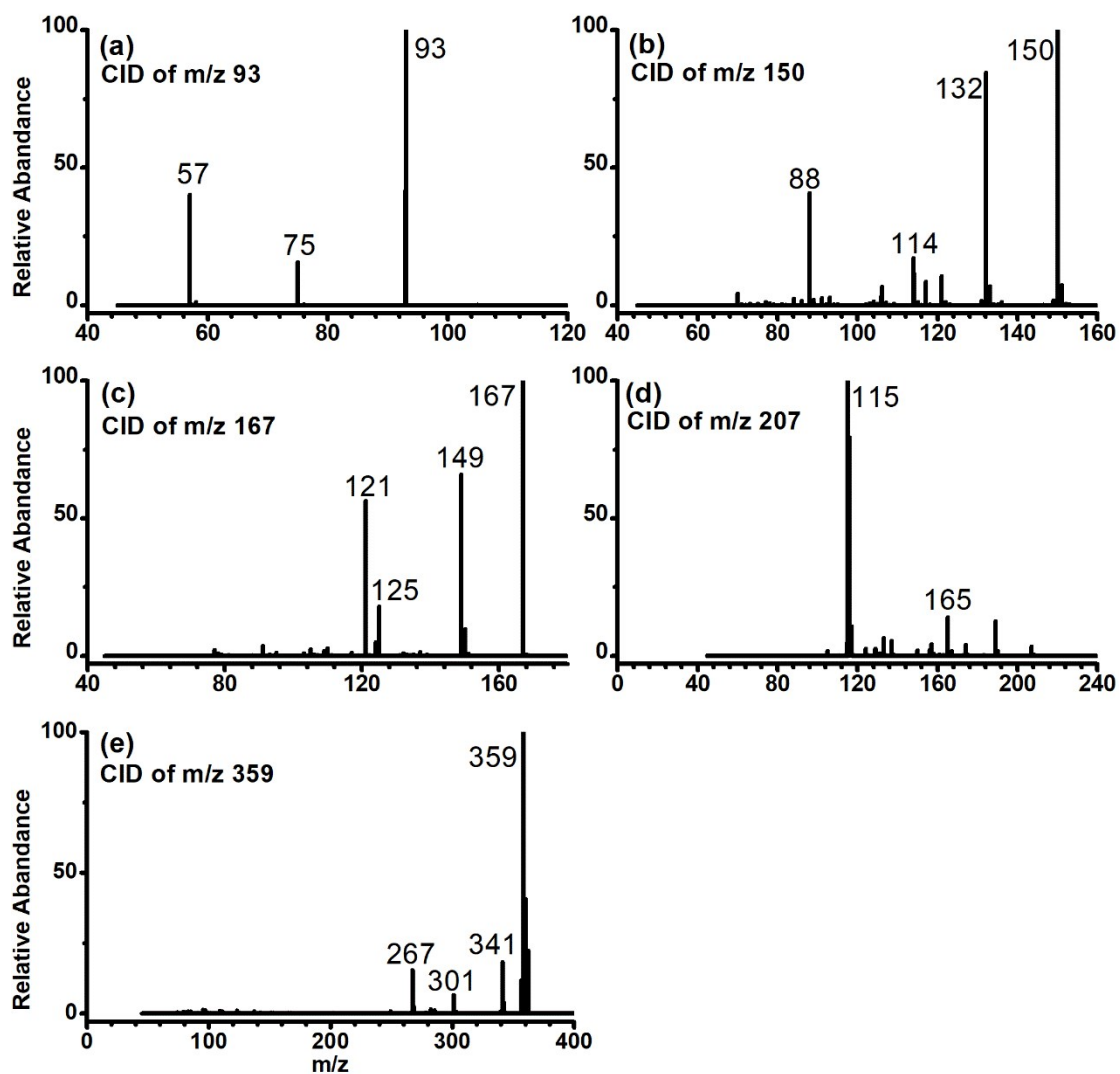

**Fig. S2** Collision-induced dissociation (CID) spectra for five precursor ions using LIAD/ESI/MS for analysis of cream DR in positive mode. (a) m/z 93; (b) m/z 150; (c) m/z 167; (d) m/z 207; (e) m/z 359.

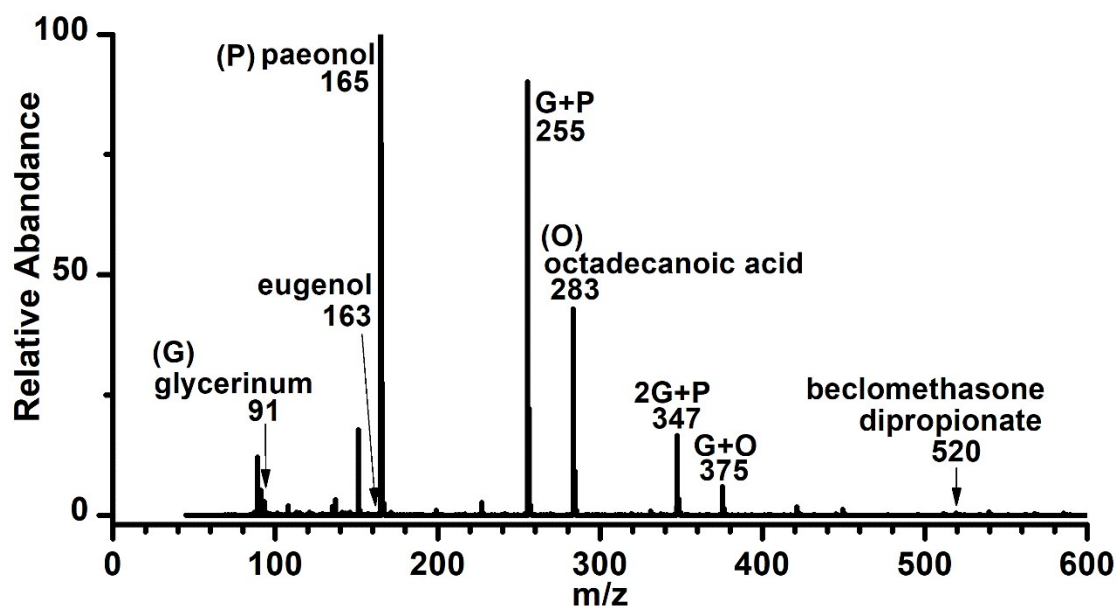

**Fig. S3** Negative-ion LIAD/ESI mass spectrum of cream DR spiked with  $50 \mu\text{g g}^{-1}$  dexamethasone 21-acetate and  $1\text{mg g}^{-1}$  beclomethasone dipropionate performed on LIAD/ESI/MS. The absolute ion intensities of paeonol ( $m/z$  165) is  $1.83 \times 10^7$  Counts.

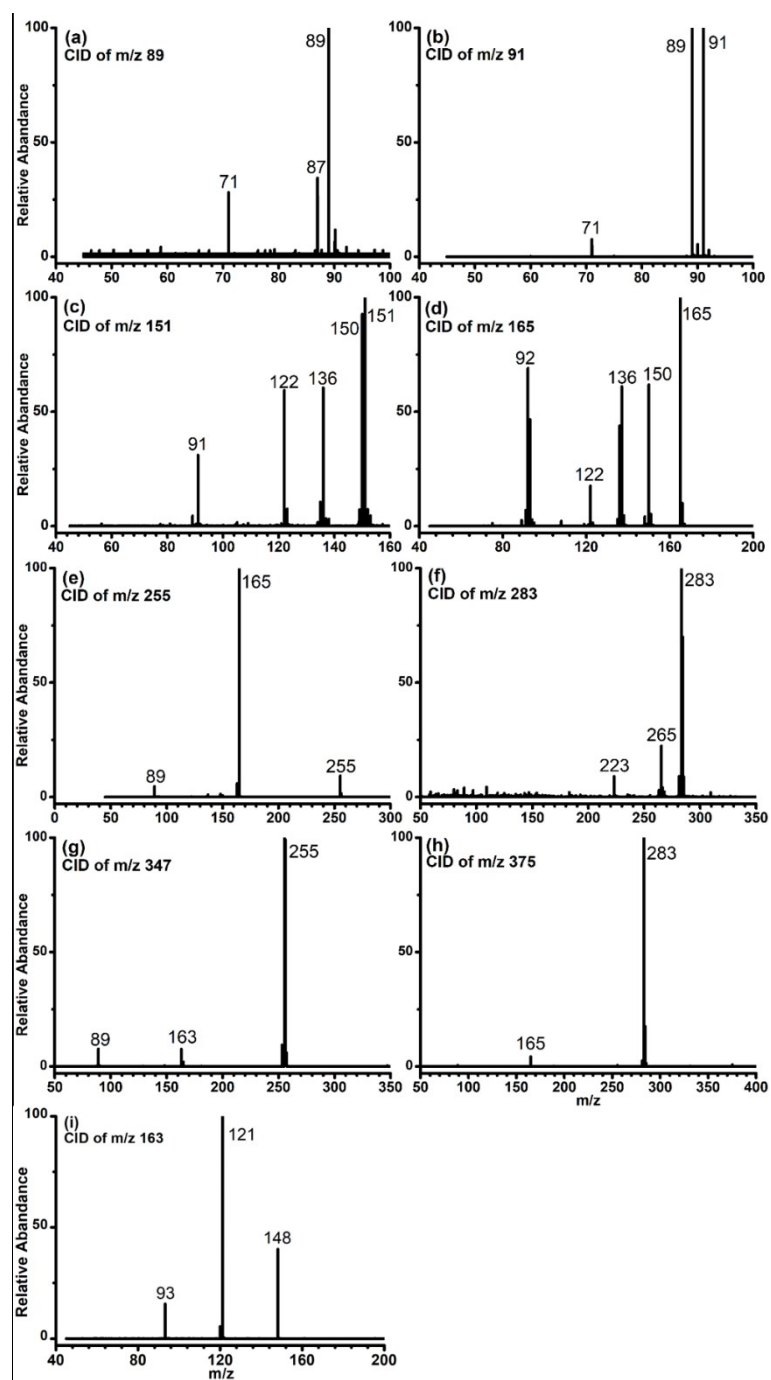

**Fig. S4** Collision-induced dissociation (CID) spectra of nine product ions using LIAD/ESI/MS for analysis of cream DR in negative mode. (a) m/z 89; (b) m/z 91; (c) m/z 151; (d) m/z 165; (e) m/z 255; (f) m/z 283; (g) m/z 347; (h) m/z 375; (i) m/z 163.

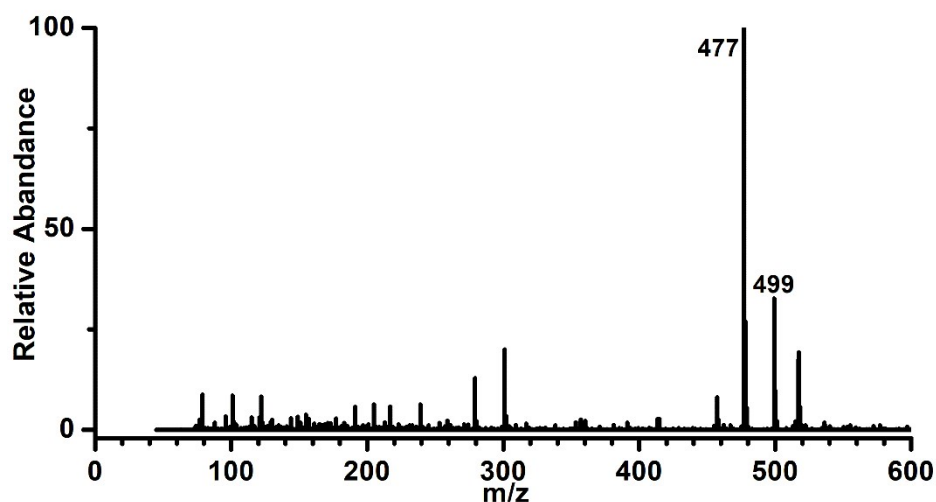

**Fig. S5** Positive-ion LIAD/ESI mass spectrum of triamcinolone. Triamcinolone is dissolved in methanol to 1 mg ml<sup>-1</sup>, then 30 μL of the standard solutions were deposited on the Ti foil. After drying, the foil was examined with LIAD/ESI/MS.

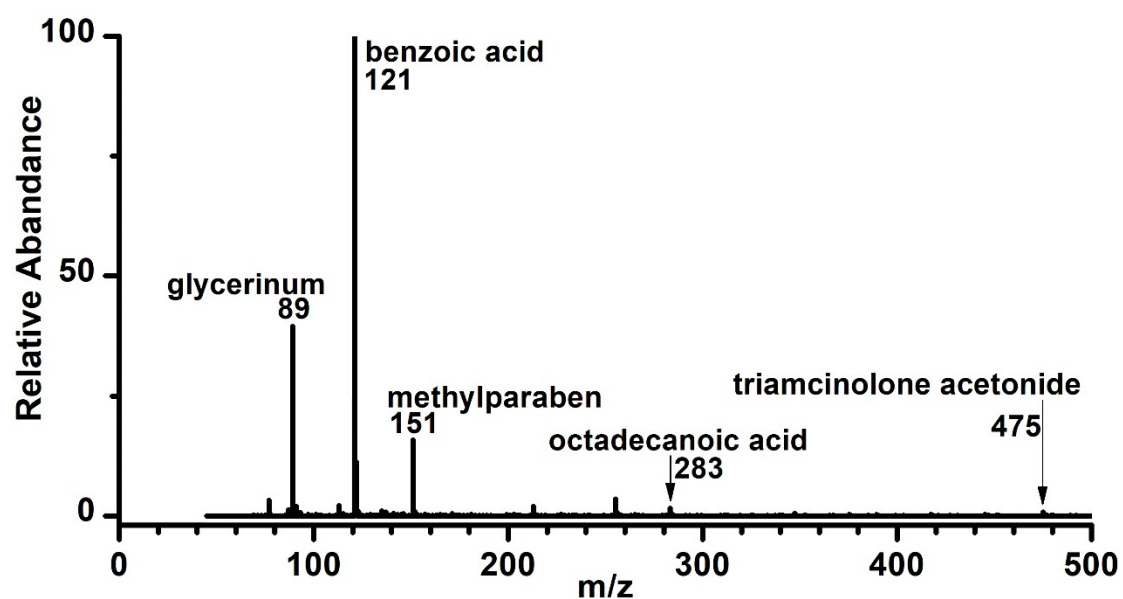

**Fig. S6** Negative-ion LIAD/ESI mass spectrum of cream TAEN (triamcinolone acetonide 1 mg/g, econazole nitrate 10 mg/g). The absolute ion intensities of benzoic acid (m/z 121) is  $1.84 \times 10^7$  Counts.

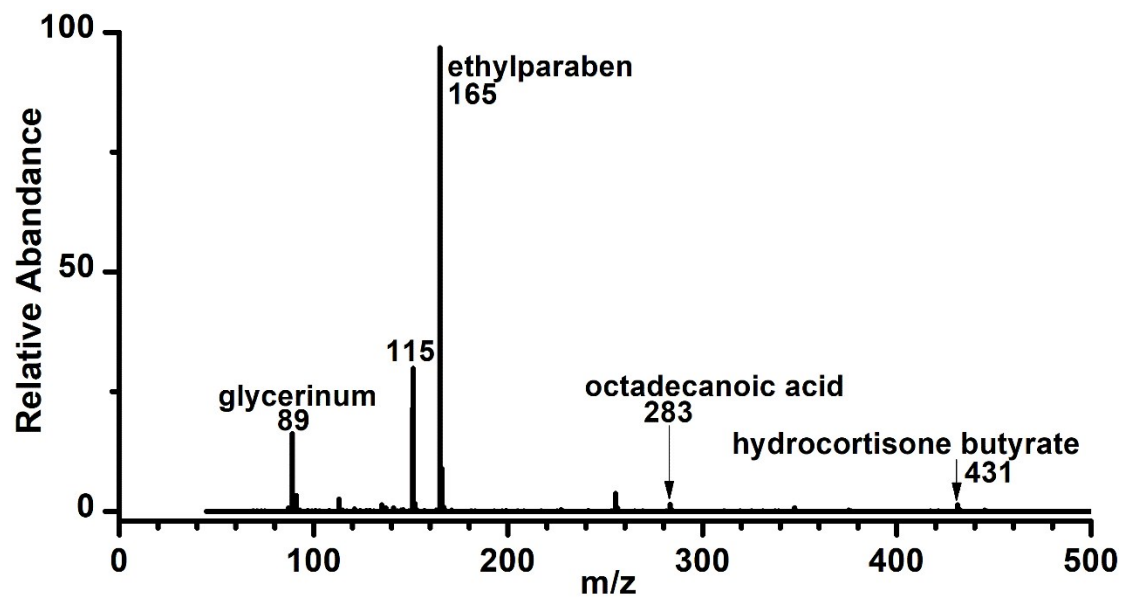

**Fig. S7** Negative-ion LIAD/ESI mass spectrum of cream HB (Hydrocortisone Butyrate  $1 \text{ mg g}^{-1}$ ). The absolute ion intensities of ethylparaben ( $m/z$  165) is  $3.0 \times 10^6$  Counts.
